# Supplementary material
Source: MDPI journal article supplement (https://www.mdpi.com/2227-9709/10/2/47)
Supplement: s1 [file s1]

**Table S1.** Useful literature information.

| Item | Title                                                                                                                                                                    | Reference |
|------|--------------------------------------------------------------------------------------------------------------------------------------------------------------------------|-----------|
| 1    | Statistics and Social Network of YouTube Videos.                                                                                                                         | [72]      |
| 2    | This would be sweet in VR*: On the discursive newness of virtual reality.                                                                                                | [73]      |
| 3    | Virtually Real or Really Virtual: Towards a Heritage Metaverse.                                                                                                          | [74]      |
| 4    | Immersive virtual reality in the age of the Metaverse: A hybrid-narrative review based on the technology affordance perspective.                                         | [75]      |
| 5    | Virtual Reality based Metaverse of Gamification.                                                                                                                         | [76]      |
| 6    | Reality Check of Metaverse: A First Look at Commercial Social Virtual Reality Platforms.                                                                                 | [77]      |
| 7    | From physical reality to the Internet and the Metaverse: A Multilayer Network Valuation.                                                                                 | [78]      |
| 8    | From Reality to Virtuality: Re-discussing Cities with the Concept of Metaverse.                                                                                          | [79]      |
| 9    | A study on virtual world of Metaverse.                                                                                                                                   | [80]      |
| 10   | Sentiment Analysis on the Metaverse: Twitter Data.                                                                                                                       | [81]      |
| 11   | Contiguous identities: The virtual self in the supposed Metaverse.                                                                                                       | [82]      |
| 12   | Digital Consumer Engagement on Blockchain-based Metaverse Platforms: Extended Reality Technologies, Spatial Analytics, and Immersive Multisensory Virtual Spaces.        | [83]      |
| 13   | Gorichanaz, T. Being at home in the metaverse? Prospectus for a social imaginary.                                                                                        | [84]      |
| 14   | A Survey on Metaverse: Fundamentals, Security, and Privacy.                                                                                                              | [85]      |
| 15   | “Metaverse”: A Future Concept at the Initial Stage of Its Basic Technology.                                                                                              | [86]      |
| 16   | Entertainment Digitalization: Driving Force, Risks and Prospects for the Creation of Metaverse.                                                                          | [87]      |
| 17   | “Cyborg” and “Metaverse”: Issues of “Body Existence” in the Context of Virtual Reality.                                                                                  | [88]      |
| 18   | All One Needs to Know about Metaverse: A Complete Survey on Technological Singularity, Virtual Ecosystem, and Research Agenda.                                           | [89]      |
| 19   | Metaverse through the prism of power and addiction: what will happen when the virtual world becomes more attractive than reality?                                        | [90]      |
| 20   | Immersive netnography: A novel method for service experience research in virtual reality, augmented reality and metaverse contexts.                                      | [91]      |
| 21   | Gaming the System: Playbour, Production, Promotion, and the Metaverse.                                                                                                   | [92]      |
| 22   | Wireless Edge-Empowered Metaverse: A Learning-Based Incentive Mechanism for Virtual Reality.                                                                             | [93]      |
| 23   | Metaverse, HCI, and Its Future.                                                                                                                                          | [94]      |
| 24   | A Descriptive Study on Metaverse: Cybersecurity Risks, Controls, and Regulatory Framework.                                                                               | [95]      |
| 25   | The Age Beyond Sports: User Experience in the World of Metaverse.                                                                                                        | [96]      |
| 26   | Metaverse: Threat or Opportunity for Our Social World? In understanding Metaverse on sociological context.                                                               | [97]      |
| 27   | Metaverse beyond the hype: Multidisciplinary perspectives on emerging challenges, opportunities, and agenda for research, practice and policy.                           | [98]      |
| 28   | Chasing Metaverses: Reflecting on Existing Literature to Understand the Business Value of Metaverses.                                                                    | [99]      |
| 29   | Metaverse and Sustainability: Systematic Review of Scientific Publications until 2022 and Beyond.                                                                        | [100]     |
| 30   | The Extended Reach of Game Engine Companies: How Companies Like Epic Games and Unity Technologies Provide Platforms for Extended Reality Applications and the Metaverse. | [101]     |
| 31   | Migration to the metaverse and its predictors: attachment to virtual places and metaverse-related threat.                                                                | [102]     |
| 32   | Let the beat flow: How game difficulty in virtual reality affects flow.                                                                                                  | [103]     |
| 33   | Metaverse Games: Game Changer for Healthcare?                                                                                                                            | [104]     |

## References

72. Cheng, X.; Dale, C.; Liu, J. Statistics and Social Network of YouTube Videos. In Proceedings of the 2008 16th International Workshop on Quality of Service, Enschede, The Netherlands, 2–4 June 2008; pp. 229–238.
73. Harley, D. This would be sweet in VR\*: On the discursive newness of virtual reality. *New Media Soc.* **2022**, *0*, 1–17. <https://doi.org/10.1177/14614448221084655>.
74. Huggett, J. Virtually Real or Really Virtual: Towards a Heritage Metaverse. *Stud. Digit. Herit.* **2020**, *4*, 1–15. <https://doi.org/10.14434/sdh.v4i1.26218>.
75. Dincelli, E.; Yayla, A. Immersive virtual reality in the age of the Metaverse: A hybrid-narrative review based on the technology affordance perspective. *J. Strateg. Inf. Syst.* **2022**, *31*, 101717. <https://doi.org/10.1016/j.jsis.2022.101717>.
76. Tayal, S.; Rajagopal, K.; Mahajan, V. Virtual Reality based Metaverse of Gamification. In Proceedings of the 2022 6th International Conference on Computing Methodologies and Communication (ICCMC), Erode, India, 29–31 March 2022; pp. 1597–1604. <https://doi.org/10.1109/ICCMC53470.2022.9753727>.
77. Cheng, R.; Wu, N.; Chen, S.; Han, B. Reality Check of Metaverse: A First Look at Commercial Social Virtual Reality Platforms. In Proceedings of the 2022 IEEE Conference on Virtual Reality and 3D User Interfaces

- Abstracts and Workshops (VRW), Christchurch, New Zealand, 12–16 March 2022; pp. 141–148. <https://doi.org/10.1109/VRW55335.2022.00040>.
78. Moro-Visconti, R. From physical reality to the Internet and the Metaverse: A Multilayer Network Valuation. *J. Metaverse* **2022**, *2*, 16–22.
  79. Kemeç, A. From Reality to Virtuality: Re-discussing Cities with the Concept of Metaverse. *Int. J. Manag.* **2022**, *4*, 12–20. <https://doi.org/10.34104/ijma.022.00120020>.
  80. Lal, S.H.; Kaif, K.M. A study on virtual world of Metaverse. *Int. Res. J. Mod. Eng. Technol. Sci.* **2022**, *4*, 4535–4538.
  81. Akkuzukaya, G. Sentiment Analysis on the Metaverse: Twitter Data. *Sak. Univ. J. Comput. Inf. Sci.* **2022**, *31*, 147–156. <https://doi.org/10.35377/saucis...1088304>.
  82. Saker, M.; Frith, J. Contiguous identities: The virtual self in the supposed Metaverse. *First Monday* **2022**, *27*, 3–7. <https://doi.org/10.5210/fm.v27i3.12471>.
  83. Kral, P.; Janoskova, K.; Potcovaru, A.-M. Digital Consumer Engagement on Blockchain-based Metaverse Platforms: Extended Reality Technologies, Spatial Analytics, and Immersive Multisensory Virtual Spaces. *Linguist. Philos. Investig.* **2022**, *21*, 252–267. <https://doi.org/10.22381/lpi21202216>.
  84. Gorichanaz, T. Being at home in the metaverse? Prospectus for a social imaginary. *AI Ethics* **2022**. <https://doi.org/10.1007/s43681-022-00198-w>.
  85. Wang, Y.; Su, Z.; Zhang, N.; Xing, R.; Liu, D.; Luan, T.H.; Shen, X. A Survey on Metaverse: Fundamentals, Security, and Privacy. *IEEE Commun. Surv. Tutor.* **2022**, *25*, 319–352. <https://doi.org/10.1109/COMST.2022.3202047>.
  86. Jian, S.-Y. “Metaverse”: A Future Concept at the Initial Stage of Its Basic Technology. *J. Shanghai Univ. Soc. Sci. Ed.* **2022**, *39*, 1–16.
  87. Jian, S.-Y. Entertainment Digitalization: Driving Force, Risks and Prospects for the Creation of Metaverse. *J. Shenzhen Univ. Humanit. Soc. Sci. Ed.* **2022**, *39*, 33–43.
  88. Jian, S.-Y. “Cyborg” and “Metaverse”: Issues of “Body Existence” in the Context of Virtual Reality. *J. Guangzhou Univ. Soc. Sci. Ed.* **2022**, *21*, 91–104.
  89. Lee, L.H.; Braud, T.; Zhou, P.; Wang, L.; Xu, D.; Lin, Z.; Kumar, A.; Bermejo, C.; Hui, P. All One Needs to Know about Metaverse: A Complete Survey on Technological Singularity, Virtual Ecosystem, and Research Agenda. *arXiv* **2021**, arXiv:2110.05352. Available online: <http://arxiv.org/abs/2110.05352> (accessed on 19 October 2021).
  90. Bojic, L. Metaverse through the prism of power and addiction: what will happen when the virtual world becomes more attractive than reality? *Eur. J. Futur. Res.* **2022**, *10*, 22. <https://doi.org/10.1186/s40309-022-00208-4>.
  91. Kozinets, R.V. Immersive netnography: A novel method for service experience research in virtual reality, augmented reality and metaverse contexts. *J. Serv. Manag.* **2022**, *24*, 100–125. <https://doi.org/10.1108/JOSM-12-2021-0481>.
  92. Foxman, M. Gaming the System: Playbour, Production, Promotion, and the Metaverse. *Balt. Screen Media Rev.* **2022**, *10*, 224–233. <https://doi.org/10.2478/bsmr-2022-0017>.
  93. Xu, M.; Niyato, D.; Kang, J.; Xiong, Z.; Miao, C.; Kim, D.I. Wireless Edge-Empowered Metaverse: A Learning-Based Incentive Mechanism for Virtual Reality. In Proceedings of the ICC 2022-IEEE International Conference on Communications, Seoul, Republic of Korea, 16–20 May 2022; pp. 5220–5225. <https://doi.org/10.1109/ICC45855.2022.9838736>.
  94. Tan, Z. Metaverse, HCI, and Its Future. In Proceedings of the 2022 3rd International Conference on Mental Health, Education and Human Development (MHEHD 2022), Dalian, China, 27–29 May 2022; Atlantis Press: State College, PA, US, 2022; pp. 897–901. <https://doi.org/10.2991/assehr.k.220704.162>.
  95. Sebastian, G. A Descriptive Study on Metaverse: Cybersecurity Risks, Controls, and Regulatory Framework. *Int. J. Secur. Priv. Pervasive Comput.* **2023**, *15*, 1–14. <https://doi.org/10.4018/IJSPPC.315591>.
  96. Demi, G.; Argan, M.; Di, H. The Age Beyond Sports: User Experience in the World of Metaverse. *J. Metaverse* **2022**, *3*, 19–27. <https://doi.org/10.57019/jmv.1176938>.
  97. WiSnu Buana, I.M. Metaverse: Threat or Opportunity for Our Social World? In understanding Metaverse on sociological context. *J. Metaverse* **2022**, *3*, 28–33. <https://doi.org/10.57019/jmv.1144470>.
  98. Dwivedi, Y.K.; Hughes, L.; Baabdullah, A.M.; Ribeiro-Navarrete, S.; Giannakis, M.; Al-Debei, M.M.; Dennehy, D.; Metri, B.; Buhalis, D.; Cheung, C.M.; et al. Metaverse beyond the hype: Multidisciplinary perspectives on emerging challenges, opportunities, and agenda for research, practice and policy. *Int. J. Inf. Manag.* **2022**, *66*, 102542. <https://doi.org/10.1016/j.jinfomgt.2022.102542>.
  99. Polyviou, A.; Pappas, I. Chasing Metaverses: Reflecting on Existing Literature to Understand the Business Value of Metaverses. *Inf. Syst. Front.* **2022**. <https://doi.org/10.1007/s10796-022-10364-4>.
  100. Jauhainen, J.S.; Krohn, C.; Junnila, J. Metaverse and Sustainability: Systematic Review of Scientific Publications until 2022 and Beyond. *Sustainability* **2023**, *15*, 346. <https://doi.org/10.3390/su15010346>.

101. Jungherr, A.; Schlarb, D.B. The Extended Reach of Game Engine Companies: How Companies Like Epic Games and Unity Technologies Provide Platforms for Extended Reality Applications and the Metaverse. *Soc. Media Soc.* **2022**, *8*, 20563051221107640. <https://doi.org/10.1177/20563051221107641>.
102. Oleksy, T.; Wnuk, A.; Piskorska, M. Migration to the metaverse and its predictors: attachment to virtual places and metaverse-related threat. *Comput. Hum. Behav.* **2022**, *141*, 107642. <https://doi.org/10.31234/osf.io/j7mxh>.
103. Lemmens, J.S.; von Münchhausen, C.F. Let the beat flow: How game difficulty in virtual reality affects flow. *Acta Psychol. (Amst.)* **2023**, *232*, 103812. <https://doi.org/10.1016/j.actpsy.2022.103812>.
104. Wiederhold, B.K. Metaverse Games: Game Changer for Healthcare? *Cyberpsychology Behav. Soc. Netw.* **2022**, *25*, 267–269. <https://doi.org/10.1089/cyber.2022.29246.editorial>
